# Supplementary material
Source: Springer Nature journal article supplement (https://www.springermedizin.de/resource/supplementary/12985_2010_828_MOESM2_ESM.pdf/9609280)

1

M

2

1500bp

1000bp

750bp

500bp

250bp

100bp

25bp

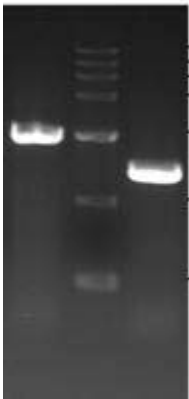

Supplement: MOESM2 [file 9609280]
